# Supplementary material
Source: MDPI journal article supplement (https://www.mdpi.com/2071-1050/15/13/10552)
Supplement: s1 [file s1]

Archive with 2 entries (2 files):
- File S1. PRISMA_2020_checklist_prosumer.pdf
- File S2. PRISMA_2020_abstract_checklist_prosumer.pdf
